# Supplementary material for: Vertical growth of SnS2 nanobelt arrays on CuSbS2 nanosheets for enhanced photocatalytic reduction of CO2
Source: Royal Society of Chemistry journal article supplement (doi:10.1039/d1cc04584a), 2021-01-01
Supplement: d1cc04584a1.pdf [file d1cc04584a1.pdf]

# Supporting Information

## Vertical growth of SnS<sub>2</sub> nanobelt arrays on CuSbS<sub>2</sub> nanosheets for enhanced photocatalytic reduction of CO<sub>2</sub>

Wenhao Li,<sup>a</sup> Quanlong Xu,<sup>\*a</sup> Wei Chen,<sup>a</sup> Faliang Gou,<sup>b</sup> Shujing Zhou,<sup>c</sup> Jinjing Li,<sup>c</sup> Chenze Qi<sup>bc</sup> and De-Kun Ma<sup>\*b</sup>

<sup>a</sup> Zhejiang Key Laboratory of Carbon Materials, Wenzhou University, Wenzhou 325027, China

<sup>b</sup> Zhejiang Key Laboratory of Alternative Technologies for Fine Chemicals Process, Shaoxing University, Shaoxing 312000, China

<sup>c</sup> School of Pharmacy, Jiamusi University, Jiamusi 154007, China.

\*Email addresses: xuql@wzu.edu.cn; dkma@usx.edu.cn

## Experimental Section

### 1. Chemicals and Purity

Cuprous chloride (CuCl, AR), Antimony trichloride (SbCl<sub>3</sub>, AR, 99%), Tin chloride pentahydrate (SnCl<sub>4</sub>·5H<sub>2</sub>O, AR, 99.0%), Thiourea (CH<sub>4</sub>N<sub>2</sub>S, ACS, ≥99.0%), Thioacetamide (C<sub>2</sub>H<sub>5</sub>NS, AR, 99%), Oleylamine (C<sub>18</sub>H<sub>37</sub>N, C<sub>18</sub>: 80-90%), Sodium sulfafate (Na<sub>2</sub>SO<sub>4</sub>, AR), and Ethanol absolute (C<sub>2</sub>H<sub>6</sub>O, AR, 95%) were purchased from Aladdin Shanghai Co. Ltd. Acetone was purchased from Zhejiang Zhongxing Chemical Co.Ltd. All the chemicals were used as received unless otherwise stated.

### 2.1 Synthesis of CuSbS<sub>2</sub> nanosheets.

In a typical synthesis, CuCl (0.5 mmol), SbCl<sub>3</sub> (0.5 mmol), and CH<sub>4</sub>N<sub>2</sub>S (1.5 mmol) were dissolved in 10 mL of oleylamine at a molar ratio of 1 : 1 : 3 and backfilled with nitrogen at 80 °C. Then, the solution was transferred into a 50 mL Teflon-lined stainless steel autoclave and heated at 240 °C for 1 h. The resultant products were washed with acetone for four times and then dried at 60 °C in oven.

### 2.2 Synthesis of SnS<sub>2</sub>⊥ CuSbS<sub>2</sub> heterostructures

To the synthesis of  $\text{SnS}_2 \perp \text{CuSbS}_2$  heterostructures, 0.25 mmol of as-synthesized  $\text{CuSbS}_2$  nanosheets were dispersed into 10 mL of ethanol absolute under stirring (A solution). 0.125 mmol of  $\text{SnCl}_4 \cdot 5\text{H}_2\text{O}$  and 0.25 mmol  $\text{CH}_4\text{N}_2\text{S}$  were added into another 10 mL of ethanol (B solution). After 10 minutes' agitation, A solution was put into B solution. After 30 minutes' stirring, the solution was transferred into a 50 mL Teflon-lined stainless steel autoclave and heated at 180 °C for 12 h. The resultant products were washed with ultrapure water, acetone, and ethanol absolute for three times. Then dried at 60 °C in oven.

### **2.3 Synthesis of $\text{SnS}_2$ nanosheets**

The synthetic conditions of  $\text{SnS}_2$  nanosheets are similar to those of  $\text{SnS}_2 \perp \text{CuSbS}_2$  heterostructures except without introduction of  $\text{CuSbS}_2$  nanosheets.

### **2.4 Preparation of photoelectrodes**

The preparation processes of  $\text{CuSbS}_2$  and  $\text{SnS}_2$  photoelectrodes are similar. In a typical process, a piece of F-doped tin oxide (FTO) glass (1 cm × 2 cm) was ultrasonically cleaned three times through successive exposure to  $\text{H}_2\text{O}_2$  (30%), ethanol, and ultrapure water. Then, 10 mg of the sample was dispersed in 1 mL of ethylene glycol by sonification. 50  $\mu\text{L}$  of the dispersion was evenly coated on the glass via direct drop-casting. Subsequently, the sample-coated glass was dried at 80 °C under vacuum, annealed in Ar at 180 °C for 2 h, and then cooled to room temperature.

## **Characterization**

X-ray diffraction (XRD, D8 Advance) was used to characterize the crystal phases of the products. Field emission scanning electron microscopy (FE-SEM, Nova NanoSEM 200), HRTEM and HAADF-STEM (JEOL ARM-200F), and EDX analysis (FEI Talos F200X TEM) were used to study the morphology, interfacial structure, and composition of the samples. UV–visible absorption spectra (UV–vis, Shimadzu 2450) obtained by a diffuse reflectance spectroscopy with  $\text{BaSO}_4$  as the reference for studying the optical responsive range of the samples. X-ray photoelectron spectroscopy (XPS, Escalab 250Xi, Thermo Scientific) using Al  $K\alpha$  radiation ( $h\nu = 1486.6$  eV) as excitation, and ultraviolet photoelectron spectroscopy (UPS) attached to the XPS system was used to analyze the

composition and chemical states of the prepared samples. N<sub>2</sub> adsorption-desorption isothermals were recorded on ASAP2020 HD88 instrument, which were used to measure specific surface area of the samples. 0.1 g of sample was added into the sample tube and then vacuumed, activated at 200 °C for 8 h. After the sample cooled to room temperature, N<sub>2</sub> adsorption-desorption curve measurement was started. PL spectra were measured on a Fluoromax-4 spectrofluorometer (HORIBA JobinYvon Inc.) under an excitation wavelength of 400 nm at room temperature. The electrochemical impedance spectra (EIS) were carried out at 2 V versus reversible hydrogen electrode with an amplitude of 5 mV in a frequency range from 0.1 MHz to 0.1 Hz in 0.5 M Na<sub>2</sub>SO<sub>4</sub> electrolyte in the dark and under light irradiation (AM1.5G, 100 mWcm<sup>-2</sup>), respectively. Photocurrent – time and photocurrent – potential curves of the photoelectrodes were performed in 0.5 M Na<sub>2</sub>SO<sub>4</sub> aqueous electrolyte under chopped light illumination (AM 1.5 G, 100 mW cm<sup>-2</sup>). The gaseous products from the photocatalytic CO<sub>2</sub>RR were analyzed by gas chromatograph (Fuli GC9790).

## **Photocatalytic CO<sub>2</sub>RR**

The photocatalytic CO<sub>2</sub>RR of the samples was evaluated in a closed reaction device containing a quartz container. In a typical process, SnS<sub>2</sub> ⊥ CuSbS<sub>2</sub> heterostructures (10 mg) were dispersed into the mixed solvent of H<sub>2</sub>O:TEOA = 10:1 (vol/vol). Then the reaction setup was alternately vacuum-degassed and purged with CO<sub>2</sub> for three times. The final pressure of the reactor containing CO<sub>2</sub> gas reaches one atmosphere. The reaction solution was stirred and irradiated under a 300 W Xenon lamp equipped with a cut-off filter ( $\lambda > 420$  nm). The temperature was controlled at 15° C by circulating cooling water and heater. The gaseous products were analyzed by a gas chromatography. To evaluate stability of the photocatalysts, the photocatalytic CO<sub>2</sub>RR was performed for 6 h at first. And then, the photocatalysts were separated from the reaction solutions by centrifugation. After washed and dried, they were re-dispersed into fresh reaction solutions to perform photocatalytic CO<sub>2</sub>RR. The process was repeated four times and the gas yield was recorded.

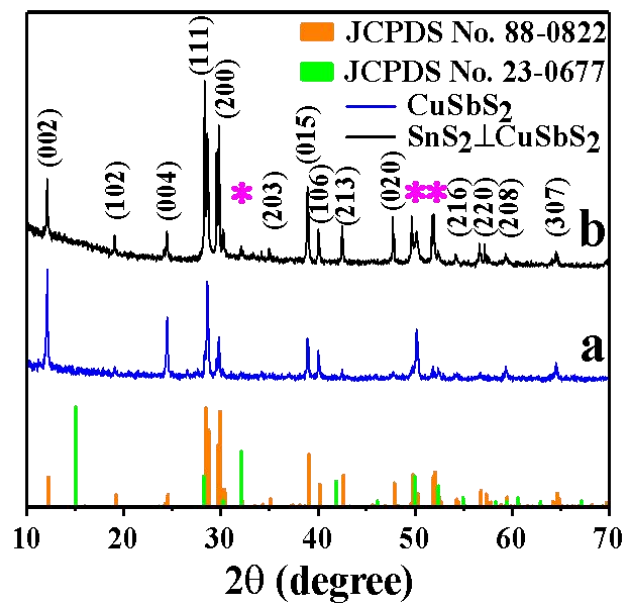

**Fig. S1** XRD patterns of the as-synthesized  $\text{CuSbS}_2$  nanosheets (a) and  $\text{SnS}_2 \perp \text{CuSbS}_2$  heterostructures (b).

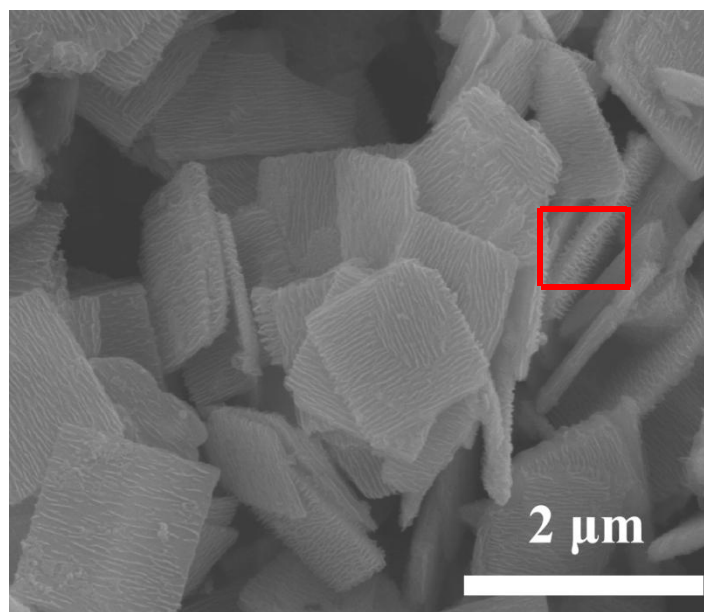

**Fig. S2** FE-SEM image of  $\text{SnS}_2 \perp \text{CuSbS}_2$  heterostructures.

As seen from red rectangular frame,  $\text{SnS}_2$  nanobelt arrays were grown on both the top and bottom of  $\text{CuSbS}_2$  nanosheets.

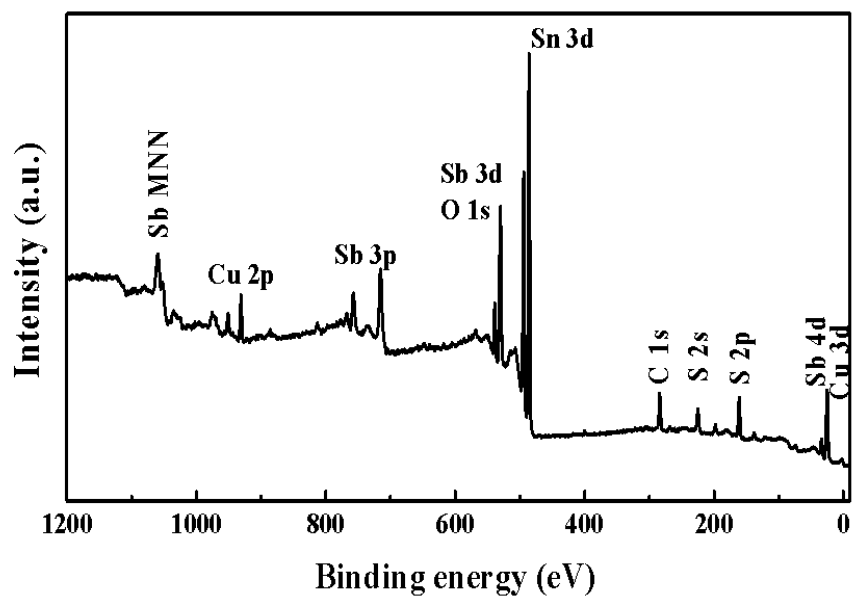

Fig. S3 XPS survey spectrum of SnS<sub>2</sub> ⊥ CuSbS<sub>2</sub> heterostructures.

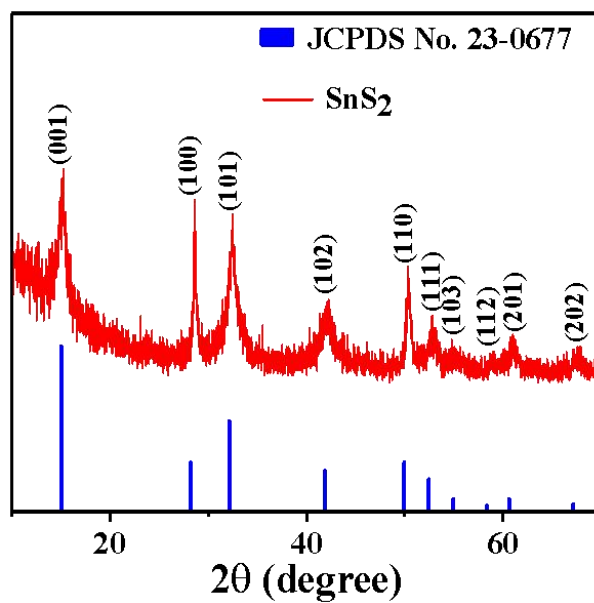

Fig. S4 XRD pattern of the as-synthesized SnS<sub>2</sub> nanosheet.

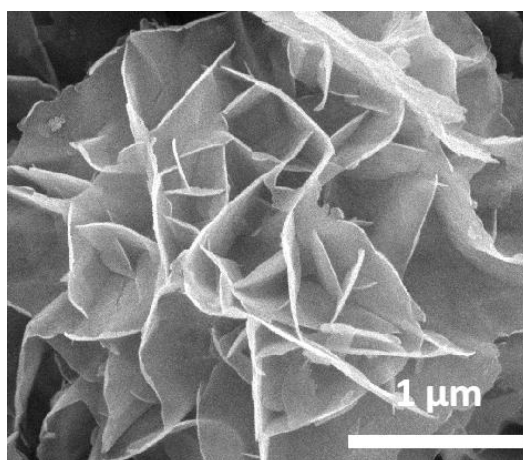

Fig. S5 FE-SEM image of the as-synthesized SnS<sub>2</sub> nanosheet.

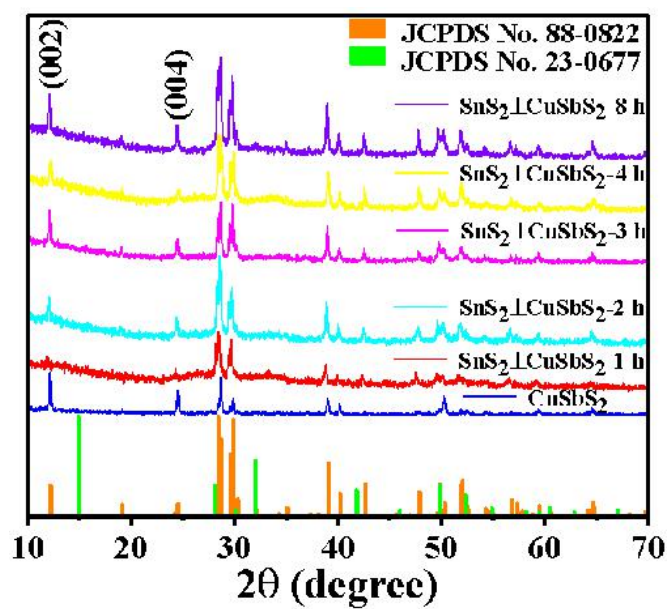

Fig. S6 Time-dependent XRD patterns of the intermediate products obtained at different reaction time.

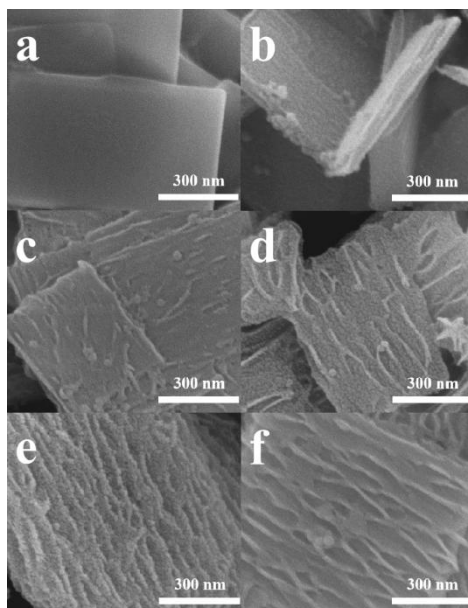

**Fig. S7** Time-dependent FE-SEM images of the intermediate products obtained at different reaction time: 0 h (a), 1 h (b), 2 h (c), 3 h (d), 4 h (e), and 8 h (f).

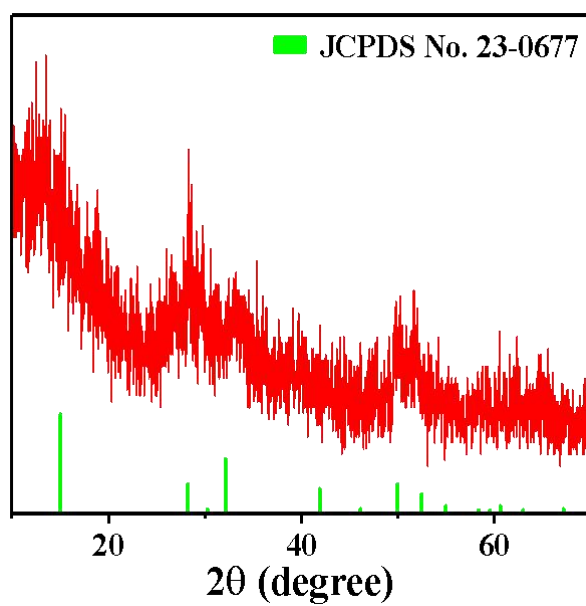

**Fig. S8** XRD pattern of the products synthesized at increased molar ratio of  $\text{SnCl}_4$  to  $\text{CuSbS}_2$ .

When the molar ratio of  $\text{SnCl}_4$  to  $\text{CuSbS}_2$  increased from 1:2 to 4:1, keeping other reaction conditions unchanged, as seen from Fig. S8, XRD diffraction peaks of  $\text{CuSbS}_2$  disappeared and only

diffraction peaks of SnS<sub>2</sub> were observed. That is to say, CuSbS<sub>2</sub> could be converted to SnS<sub>2</sub> in the present reaction system.

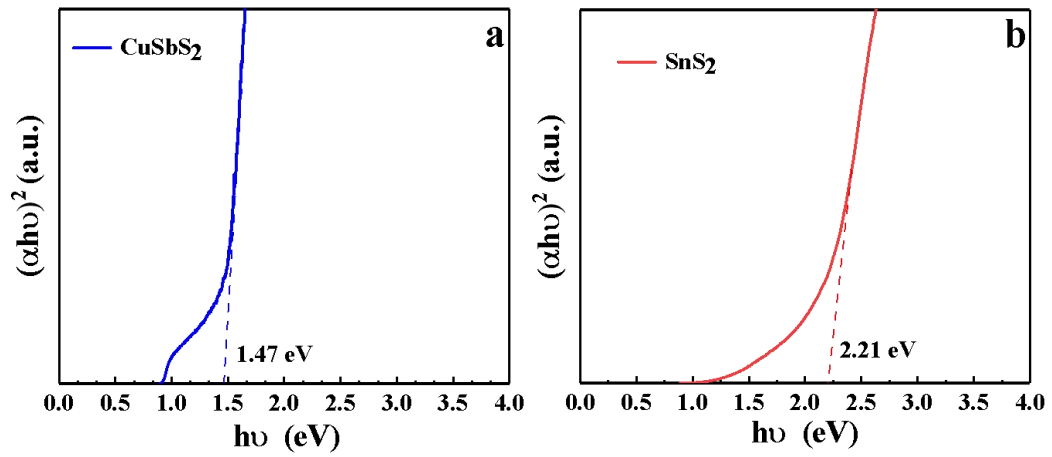

**Fig. S9**  $(\alpha h\nu)^2$  versus  $h\nu$  curves of CuSbS<sub>2</sub> nanosheets (a) and SnS<sub>2</sub> nanosheets (b).



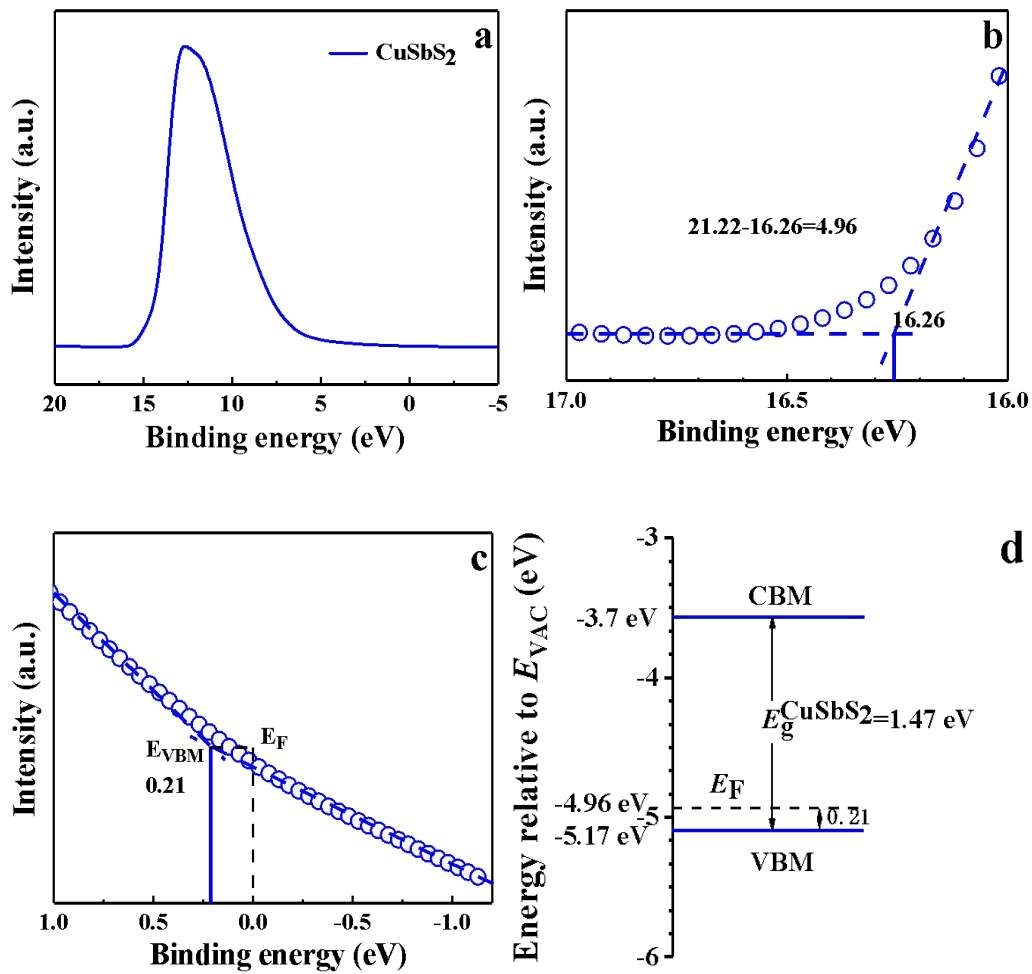

**Fig. S10** UPS spectrum of CuSbS<sub>2</sub> (a). The secondary electron cut-off energy of 16.26 eV (b), which is determined from the intersection of the linear portion of spectrum and the baseline. The determination of  $E_{VBM}$  (c). Schematic energy band positions of CuSbS<sub>2</sub> with respect to the vacuum level (d).

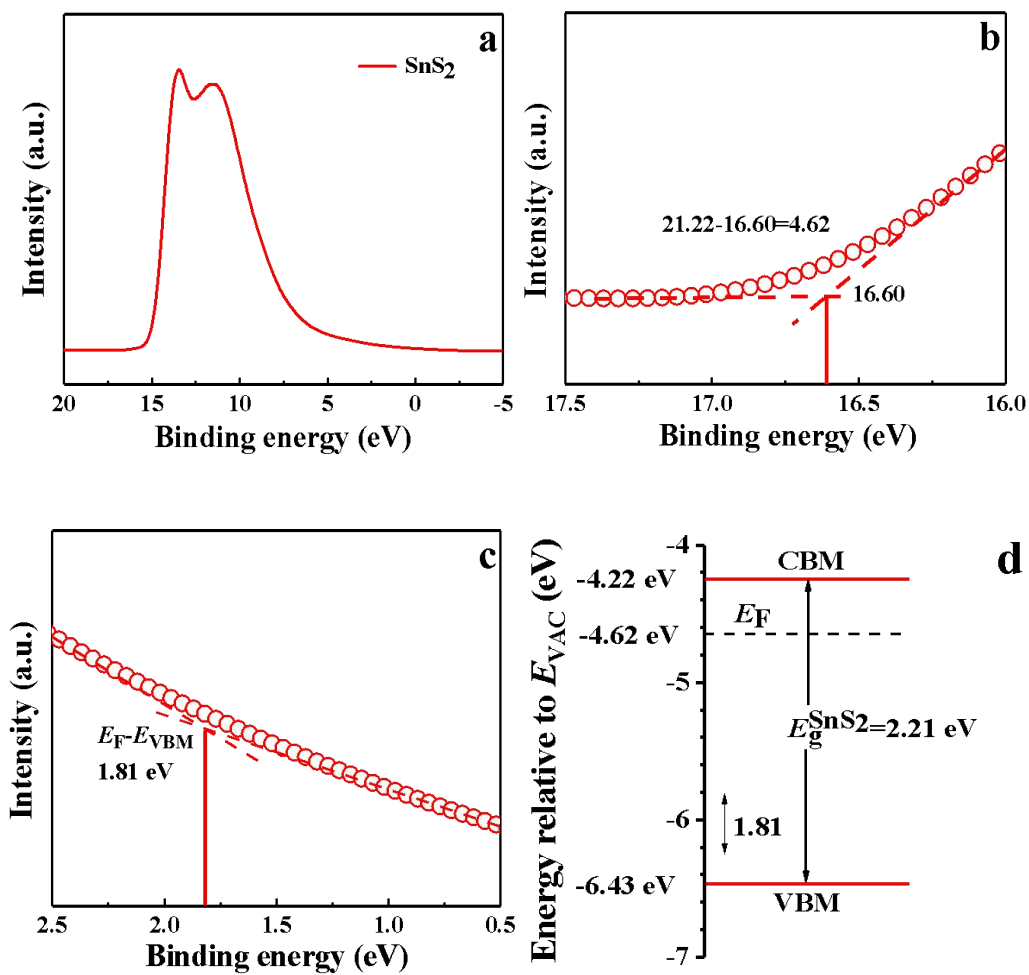

**Fig. S11** UPS spectrum of SnS<sub>2</sub> (a). The secondary electron cut-off energy of 16.60 eV (b), which is determined from the intersection of the linear portion of spectrum and the baseline. The determination of  $E_{\text{VBM}}$  (c). Schematic energy band positions of SnS<sub>2</sub> with respect to the vacuum level (d).

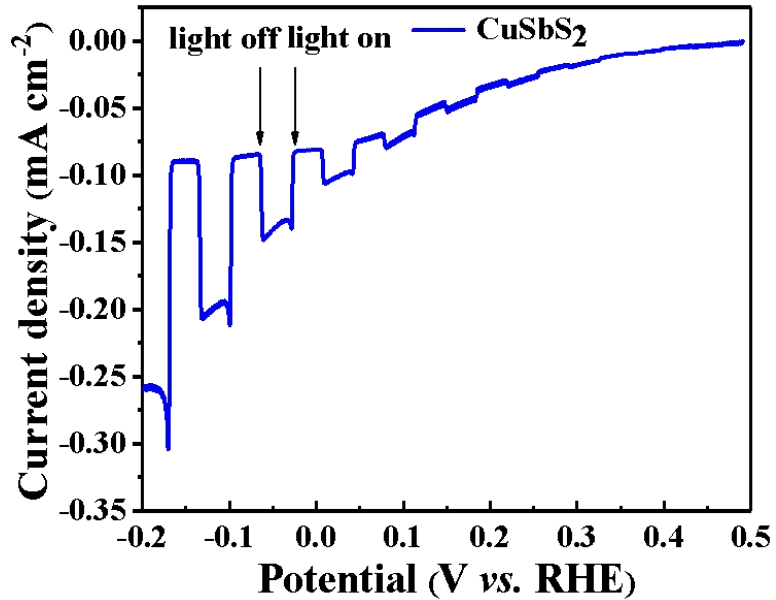

**Fig. S12** Photocurrent–potential curve of CuSbS<sub>2</sub> nanosheets under chopped light illumination (AM 1.5 G, 100 mW cm<sup>-2</sup>).

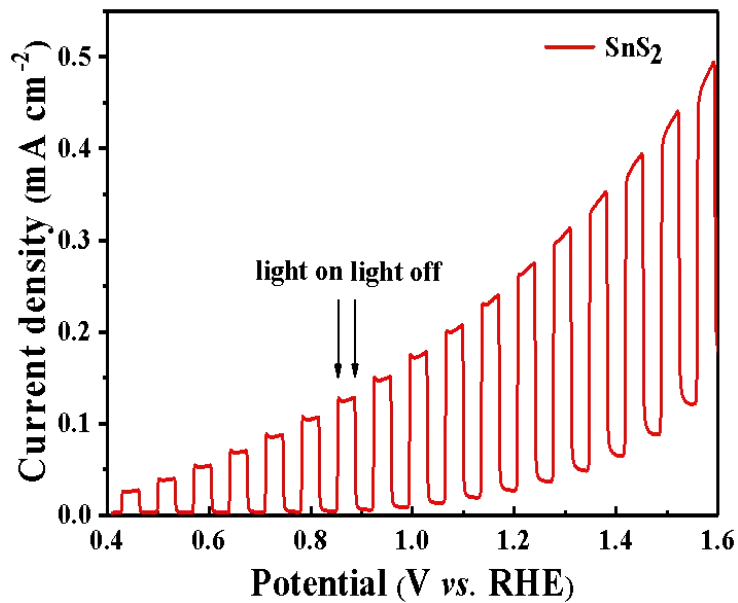

**Fig. S13** Photocurrent–potential curve of SnS<sub>2</sub> nanosheets under chopped light illumination (AM 1.5 G, 100 mW cm<sup>-2</sup>).

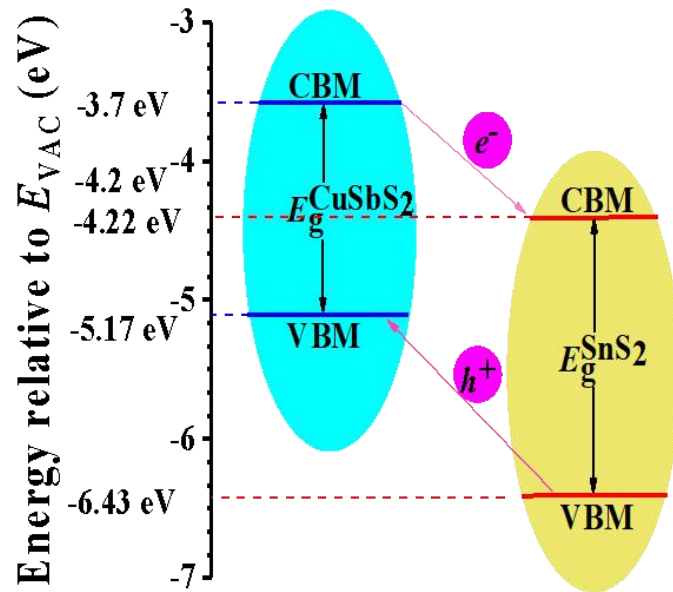

**Fig. S14** Schematic energy band diagram of SnS<sub>2</sub> nanosheets and CuSbS<sub>2</sub> nanosheets and separation process of photogenerated carriers.

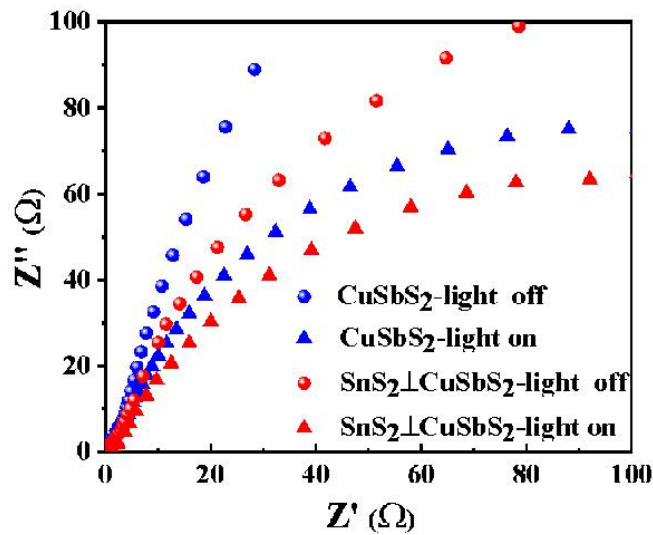

**Fig. S15** Nyquist plots of CuSbS<sub>2</sub> nanosheets and SnS<sub>2</sub>⊥ CuSbS<sub>2</sub> heterostructures obtained at an applied potential of 2 V vs. RHE performed in the dark and under light illumination (AM 1.5 G, 100 mW cm<sup>-2</sup>).

As shown in Fig. S15, in both instances, namely, under light irradiation and in the dark,  $\text{SnS}_2 \perp \text{CuSbS}_2$  heterostructures showed smaller resistance of charge transfer than individual  $\text{CuSbS}_2$ . This result showed that the heterostructure promoted the transfer of charge.

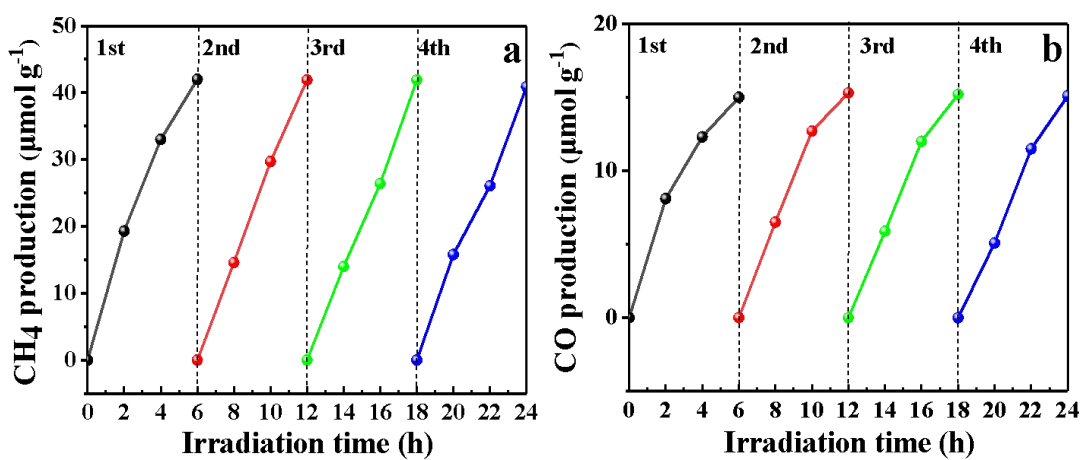

Fig. S16 The stability of  $\text{SnS}_2 \perp \text{CuSbS}_2$  heterostructures after 4 cycles photocatalytic  $\text{CO}_2\text{RR}$ .

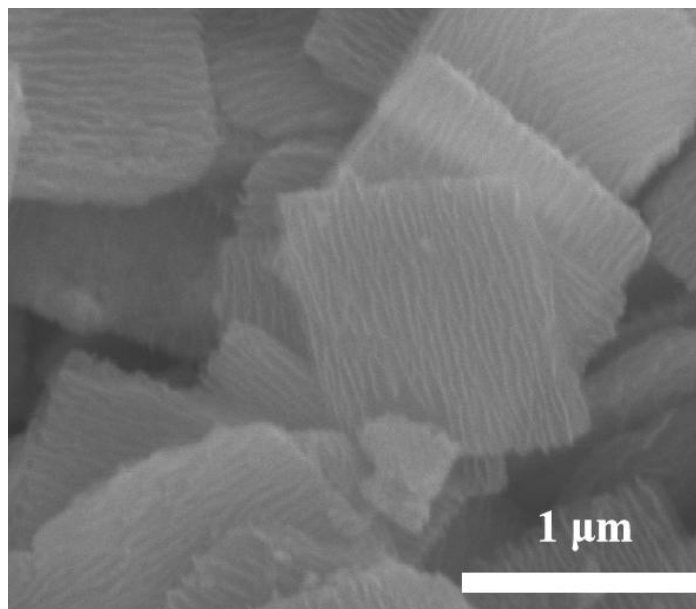

Fig. S17 FESEM image of the sample after four times photocatalytic  $\text{CO}_2\text{RR}$ .

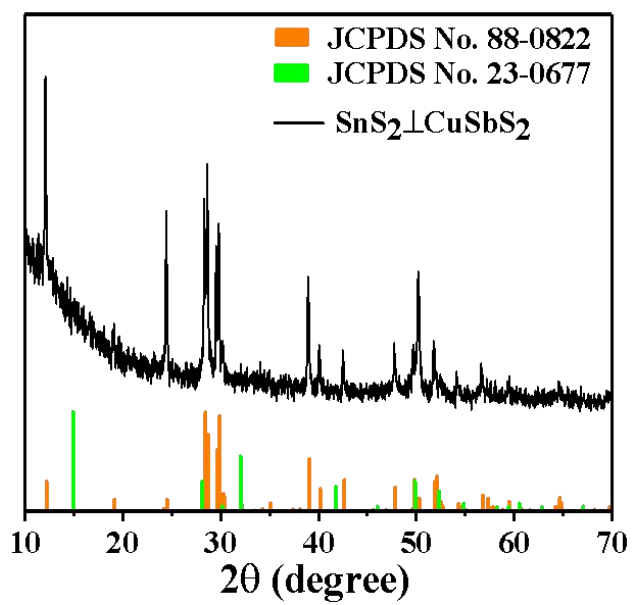

Fig. S18 XRD pattern of the sample after four times photocatalytic  $\text{CO}_2\text{RR}$ .
